# Supplementary material for: Modification of tumour cell metabolism modulates sensitivity to Chk1 inhibitor-induced DNA damage
Source: PubMed Central journal article supplement (PMC5247758; doi:10.1038/srep40778), 2017-01-20
Supplement: srep40778-s1.pdf [file srep40778-s1.pdf]

## Modification of tumour cell metabolism modulates sensitivity to Chk1 inhibitor-induced DNA damage

Andrew J Massey

Supplementary Information

**Supplementary Table S1.** Statistical comparisons for figure 1A.

| Combination    | Single Agent (SA) |     |     |     |     |     |     |     |     |      |     |     |
|----------------|-------------------|-----|-----|-----|-----|-----|-----|-----|-----|------|-----|-----|
|                | HU                | 2DG | MET | OX  | GSK | 6AN | SIM | PIP | TH  | LBUT | CHL | VER |
| HT29 pH2AX     |                   |     |     |     |     |     |     |     |     |      |     |     |
| SA vs DMSO     | ***               | ns  | ns  | ns  | *   | *   | ns  | **  | **  | ns   | *** | *** |
| Combo vs SA    | ***               | *** | *** | *** | *** | *** | *** | *** | *** | ***  | *** | ns  |
| Combo vs Chk1i | ***               | *** | *** | *** | *   | *** | ns  | **  | **  | ns   | **  | *** |
| HT29 pChk1     |                   |     |     |     |     |     |     |     |     |      |     |     |
| SA vs DMSO     | ***               | *   | ns  | ns  | *   | *** | ns  | ns  | **  | ns   | *** | *** |
| Combo vs SA    | *                 | *** | *** | *** | *** | ns  | *** | *** | *** | ***  | ns  | **  |
| Combo vs Chk1i | **                | *   | *** | *** | *   | ns  | ns  | **  | *** | ns   | *** | **  |
| U2OS pH2AX     |                   |     |     |     |     |     |     |     |     |      |     |     |
| SA vs DMSO     | ***               | *   | *   | ns  | **  | ns  | ns  | ns  | *** | ns   | ns  | ns  |
| Combo vs SA    | ***               | *** | **  | ns  | *** | *** | *** | *** | *** | ***  | *** | *** |
| Combo vs Chk1i | ***               | *** | *** | *** | **  | *** | ns  | *** | ns  | ns   | *** | *   |
| U2OS pChk1     |                   |     |     |     |     |     |     |     |     |      |     |     |
| SA vs DMSO     | ***               | ns  | ns  | *   | **  | ns  | ns  | *   | *** | *    | ns  | **  |
| Combo vs SA    | **                | *   | ns  | ns  | *   | ns  | *** | **  | *** | ***  | *** | *** |
| Combo vs Chk1i | ***               | *   | *** | *** | **  | **  | ns  | **  | ns  | ns   | *** | *   |

**Supplementary Table S2.** Densitometric analysis of HT29 western blots from figure 1B.

|       | Percentage Change Relative to DMSO |     |     |     |     |     |     |     |     |      |      |     |
|-------|------------------------------------|-----|-----|-----|-----|-----|-----|-----|-----|------|------|-----|
|       | HU                                 | 2DG | MET | OX  | GSK | 6AN | SIM | PIP | TH  | LBUT | CHL  | VER |
| pS296 | 3.2                                | 0.9 | 2.0 | 2.1 | 0.9 | 0.6 | 2.0 | 2.2 | 0.4 | 1.6  | 0.4  | 0.4 |
| pS317 | 29.5                               | 3.4 | 0.6 | 0.6 | 1.3 | 0.7 | 1.4 | 1.1 | 0.3 | 1.2  | 6.6  | 1.9 |
| Chk1  | 0.5                                | 0.5 | 0.7 | 0.6 | 0.5 | 0.3 | 0.5 | 0.5 | 0.5 | 0.7  | 0.3  | 0.3 |
| pChk2 | 3.4                                | 1.5 | 1.7 | 1.3 | 1.1 | 0.8 | 1.0 | 1.0 | 0.8 | 1.1  | 0.7  | 2.8 |
| pRPA  | 6.1                                | 0.7 | 0.7 | 0.5 | 0.4 | 0.4 | 0.2 | 0.3 | 0.3 | 0.5  | 0.9  | 0.5 |
| H2AX  | 3.9                                | 3.0 | 2.1 | 3.0 | 1.3 | 1.8 | 0.9 | 0.6 | 3.7 | 1.4  | 10.5 | 6.2 |

Densitometric analysis was conducted using Image J software. Band intensities were normalised to Chk1 for pS296 and pS317 and to GAPDH for all others, and fold change relative to DMSO calculated.

**Supplementary Table S3.** Densitometric analysis of U2OS western blots from figure 1B.

|       | Percentage Change Relative to DMSO |     |     |     |     |     |     |     |     |      |     |     |
|-------|------------------------------------|-----|-----|-----|-----|-----|-----|-----|-----|------|-----|-----|
|       | HU                                 | 2DG | MET | OX  | GSK | 6AN | SIM | PIP | TH  | LBUT | CHL | VER |
| pS296 | 0.9                                | 0.2 | 0.7 | 0.5 | 0.1 | 0.1 | 0.3 | 0.7 | 0.3 | 0.4  | 0.5 | 0.3 |
| pS317 | 8.8                                | 2.0 | 2.2 | 0.6 | 0.9 | 0.9 | 1.2 | 1.5 | 1.4 | 1.9  | 2.3 | 1.1 |
| Chk1  | 1.0                                | 0.8 | 1.2 | 1.0 | 0.9 | 1.1 | 1.1 | 1.1 | 0.7 | 1.1  | 0.9 | 0.9 |
| pChk2 | 6.6                                | 1.9 | 1.7 | 1.1 | 1.2 | 1.1 | 1.1 | 0.9 | 1.0 | 1.2  | 0.8 | 1.3 |
| pRPA  | 30.8                               | 6.6 | 1.9 | 1.5 | 1.9 | 1.2 | 1.0 | 1.9 | 2.0 | 1.5  | 0.2 | 1.7 |
| H2AX  | 1.0                                | 0.8 | 1.0 | 0.4 | 0.3 | 1.7 | 3.3 | 1.7 | 3.3 | 1.9  | 1.4 | 0.5 |

Densitometric analysis was conducted using Image J software. Band intensities were normalised to Chk1 for pS296 and pS317 and to GAPDH for all others, and fold change relative to DMSO calculated.

A

HT29

|           |                   | pH2AX +ve (%) |      |      |      |  |
|-----------|-------------------|---------------|------|------|------|--|
| V411 (μM) | GSK 2837808A (μM) |               |      |      |      |  |
|           | 80                | 40            | 20   | 10   | 5    |  |
| 1.0       | 1.04              | 0.98          | 1.00 | 0.99 | 1.00 |  |
| 0.3       | 0.51              | 0.75          | 0.87 | 1.00 | 0.91 |  |
| 0.1       | 0.80              | 1.25          | 1.47 | 1.45 | 1.45 |  |

|           |          | pH2AX +ve (%) |      |      |      |  |
|-----------|----------|---------------|------|------|------|--|
| V411 (μM) | CHL (μM) |               |      |      |      |  |
|           | 80       | 40            | 20   | 10   | 5    |  |
| 1.0       | 0.89     | 0.88          | 0.82 | 0.83 | 0.84 |  |
| 0.3       | 0.18     | 0.28          | 0.27 | 0.29 | 0.41 |  |
| 0.1       | 0.18     | 0.42          | 0.58 | 0.63 | 0.75 |  |

|           |                   | pChk1 +ve (%) |      |      |      |  |
|-----------|-------------------|---------------|------|------|------|--|
| V411 (μM) | GSK 2837808A (μM) |               |      |      |      |  |
|           | 80                | 40            | 20   | 10   | 5    |  |
| 1.0       | 1.08              | 0.98          | 1.02 | 1.00 | 1.03 |  |
| 0.3       | 0.65              | 1.02          | 1.01 | 1.19 | 1.06 |  |
| 0.1       | 2.65              | 1.78          | 2.28 | 1.81 | 1.85 |  |

|           |          | pChk1 +ve (%) |      |      |      |  |
|-----------|----------|---------------|------|------|------|--|
| V411 (μM) | CHL (μM) |               |      |      |      |  |
|           | 80       | 40            | 20   | 10   | 5    |  |
| 1.0       | 1.11     | 0.82          | 0.69 | 0.73 | 0.76 |  |
| 0.3       | 0.81     | 0.43          | 0.20 | 0.29 | 0.55 |  |
| 0.1       | 1.00     | 0.96          | 1.02 | 1.70 | 1.59 |  |

U2OS

|           |                   | pH2AX +ve (%) |      |      |      |  |
|-----------|-------------------|---------------|------|------|------|--|
| V411 (μM) | GSK 2837808A (μM) |               |      |      |      |  |
|           | 80                | 40            | 20   | 10   | 5    |  |
| 1.0       | 1.53              | 1.08          | 0.92 | 0.88 | 0.91 |  |
| 0.3       | 0.20              | 0.09          | 0.16 | 0.33 | 0.62 |  |
| 0.1       | 0.45              | 0.28          | 0.50 | 0.87 | 1.17 |  |

|           |          | pH2AX +ve (%) |      |      |      |  |
|-----------|----------|---------------|------|------|------|--|
| V411 (μM) | CHL (μM) |               |      |      |      |  |
|           | 80       | 40            | 20   | 10   | 5    |  |
| 1.0       | 0.94     | 0.94          | 0.97 | 0.98 | 0.97 |  |
| 0.3       | 0.12     | 0.19          | 0.35 | 0.56 | 0.80 |  |
| 0.1       | 0.05     | 0.33          | 0.96 | 1.28 | 1.03 |  |

|           |                   | pChk1 +ve (%) |      |      |      |  |
|-----------|-------------------|---------------|------|------|------|--|
| V411 (μM) | GSK 2837808A (μM) |               |      |      |      |  |
|           | 80                | 40            | 20   | 10   | 5    |  |
| 1.0       | 1.69              | 1.09          | 0.88 | 0.86 | 0.91 |  |
| 0.3       | 0.41              | 0.16          | 0.30 | 0.51 | 0.76 |  |
| 0.1       | 1.21              | 0.89          | 1.38 | 1.28 | 1.59 |  |

|           |          | pChk1 +ve (%) |      |      |      |  |
|-----------|----------|---------------|------|------|------|--|
| V411 (μM) | CHL (μM) |               |      |      |      |  |
|           | 80       | 40            | 20   | 10   | 5    |  |
| 1.0       | 0.97     | 0.94          | 0.97 | 1.01 | 0.96 |  |
| 0.3       | 0.16     | 0.31          | 0.52 | 0.75 | 0.98 |  |
| 0.1       | 0.22     | 0.94          | 1.39 | 1.31 | 1.34 |  |

B

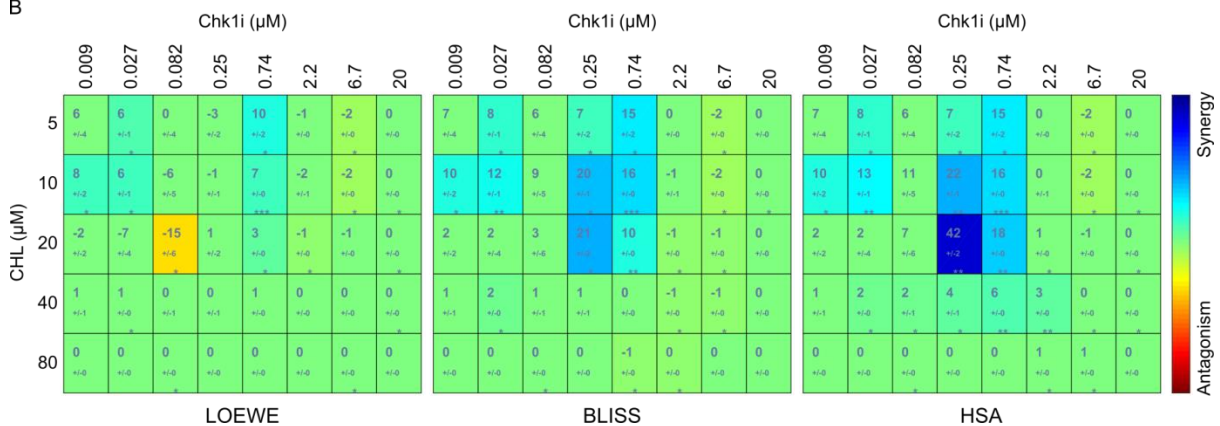

**Supplementary Figure S1.** Related to figure 2.

(A) Combination Index (CI) scores were calculated from the data in figure 2A using the model of Bliss Independence. Combinations where the CI < 0.75 (indicating synergy) are highlighted in red. (B) Synergy (Loewe, Bliss and HSA) for the combination of CHL with Chk1i in HT29 cells was calculated using Combenefit software.

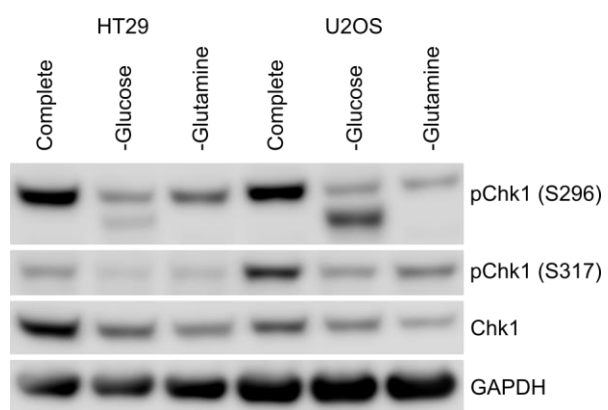

**Supplementary Figure S2.** Related to figure 6.  
Repeat western blot of figure 6C.
